# Supplementary material
Source: PubMed Central journal article supplement (PMC6030602)
Supplement: rsbl20180270supp1.pdf [file rsbl20180270supp1.pdf]

Electronic Supplementary Material (ESM)

**Histology of the endothermic opah (*Lampris guttatus*) suggests a new structure-function relationship in teleost fish bone**

Donald Davesne<sup>1</sup>, François J. Meunier<sup>2</sup>, Matt Friedman<sup>3</sup>, Roger B. J. Benson<sup>1</sup> and Olga Otero<sup>4</sup>

<sup>1</sup>Department of Earth Sciences, University of Oxford, Oxford, UK

<sup>2</sup>BOREA (UMR 7208 CNRS, MNHN, IRD, Sorbonne Université), Muséum national d'Histoire naturelle, Paris, France

<sup>3</sup>Museum of Paleontology and Department of Earth and Environmental Sciences, University of Michigan, Ann Arbor, MI, USA

<sup>4</sup>PalEvoPrim (UMR 7262 CNRS), Université de Poitiers, Poitiers, France

*Author for correspondence:* Donald Davesne, [donald.davesne@earth.ox.ac.uk](mailto:donald.davesne@earth.ox.ac.uk)

2 ESM tables

### **Comment on the renewed taxonomy of *Lampris* species**

The individual of *Lampris* sp. studied here (MNHN-ZA-AC-A-7506) is a historical specimen previously referred to the species *Lampris guttatus*. The original publications in which endothermy was initially reported were also based on individuals referred to *L. guttatus* [1,2]. Shortly after completion of our histological work, the once circumglobal *L. guttatus* was divided in five species, each having a more limited geographical range [3]. As a consequence, the specimens in which whole-body endothermy has been detected [1] would belong to the North Pacific species *L. incognitus* (N. Wegner, pers. comm.), and our specimen might not pertain to the same species. There is no available information on where MNHN-ZA-AC-A-7506 was collected, and since the specimen consists only in a portion of vertebral column and associated ribs, it is impossible to confirm its identity based on comparative anatomy. On the other hand, the six extant species of *Lampris* are all very similar in terms of ecology, external morphology and behaviour [3], and all seem to share similar pectoral muscle anatomy (N. Wegner, pers. comm., D.D. and F.J.M. pers. obs.). It is then reasonably likely that they are all capable of endothermy, which would not change the conclusions of the present paper.

**ESM table S1.** List of specimens used for the histological observations.

Only one bone was sampled for each extant taxon, due to their rarity in osteological collections. Only non-pathological and non-hyperostotic bones were used. When possible, only ribs were sampled, with one exception (*Velifer hypselopterus*) that we do not expect to affect the results since cellular or acellular bone has been shown to be consistent over the whole skeleton in virtually all teleosts [4,5].

In addition to the two extant lampridiforms, six fossil acanthomorphs and close neoteleost relatives from the Cenomanian (Late Cretaceous) of Lebanon were sampled as well.

For *Lampris* sp. (MNHN-ZA-AC-A-7506) the 7<sup>th</sup> abdominal rib was sectioned transversally and longitudinally ~5 mm from the articular head. For fossil taxa, we took samples where ribs were already fragmented or broken. The thin section photographs of Fig. 1 were modified to edit out background noise and remaining soft tissues in bone cavities.

All thin sections are kept in the palaeohistological collections of the Muséum national d'Histoire naturelle (MNHN, Paris, France).

| <b>Taxon</b>                         | <b>Dry skeleton specimen number</b> | <b>Bone sampled</b>                               |
|--------------------------------------|-------------------------------------|---------------------------------------------------|
| <i>Lampris</i> sp.                   | MNHN-ZA-AC-A-7506                   | 7 <sup>th</sup> abdominal rib                     |
| <i>Velifer hypselopterus</i>         | MNHN-ICOS-01117                     | scapula                                           |
| † <i>Aipichthys</i> <i>velifer</i>   | MNHN.F.HAK1991                      | 1 <sup>st</sup> and 6 <sup>th</sup> abdominal rib |
| † <i>Omosoma</i> sp.                 | MNHN.F.SHA2563d                     | 7 <sup>th</sup> abdominal rib                     |
| † <i>Acrogaster heckeli</i>          | MNHN.F.SHA38g                       | posteriormost abdominal rib                       |
| † <i>Eurypholis</i> sp.              | MNHN.F.HAK1550                      | 3 <sup>rd</sup> abdominal rib                     |
| † <i>Ctenothrissa vexillifer</i>     | MNHN.F.HAK246d                      | 6 <sup>th</sup> abdominal rib                     |
| † <i>Pycnosteroides levispinosus</i> | MNHN.F.HDJ55                        | posteriormost abdominal rib                       |

**ESM table S2.** Selected list of acanthomorph and neoteleost taxa for which the type of bone (cellular or acellular) is known.

| Systematic position                 | Taxon                                 | Bone type                                         | References   |
|-------------------------------------|---------------------------------------|---------------------------------------------------|--------------|
| <b>Other Neoteleostei</b>           |                                       |                                                   |              |
| Neoteleostei <i>incertae sedis</i>  | † <i>Ctenothrissa vexillifer</i>      | acellular                                         | this study   |
| Aulopiformes                        | † <i>Eurypholis</i> sp.               | acellular                                         | this study   |
| <b>Acanthomorpha</b>                |                                       |                                                   |              |
| Acanthomorpha <i>incertae sedis</i> | † <i>Pycnosteroides levispinosus</i>  | acellular                                         | this study   |
| stem-Lampridiformes                 | †' <i>Aipichthys</i> ' <i>velifer</i> | acellular                                         | this study   |
| Lampridiformes, Veliferidae         | <i>Velifer hypselopterus</i>          | acellular                                         | this study   |
| Lampridiformes, Lampridae           | <i>Lampris</i> sp.                    | cellular                                          | this study   |
| Lampridiformes, Trachipteridae      | <i>Trachipterus trachipterus</i>      | acellular                                         | [6]          |
|                                     | <i>Zu cristatus</i>                   | acellular                                         | [6]          |
| Lampridiformes, Regalecidae         | <i>Regalecus russelii</i>             | acellular (except in hyperostotic pterygiophores) | [7]          |
| Polymixiiformes                     | † <i>Omosoma</i> sp.                  | acellular                                         | this study   |
| Trachichthyiformes                  | † <i>Acrogaster heckeli</i>           | acellular                                         | this study   |
| Xiphioidae, Xiphiidae               | <i>Xiphias gladius</i>                | acellular                                         | [6,8]        |
| Xiphioidae, Istiophoridae           | <i>Istiophorus albicans</i>           | acellular                                         | [4,8]        |
|                                     | <i>Kajikia albida</i>                 | acellular                                         | [8]          |
|                                     | <i>Makaira nigricans</i>              | acellular                                         | [4,8]        |
|                                     | <i>Tetrapturus angustirostris</i>     | acellular                                         | [8]          |
|                                     | <i>Tetrapturus belone</i>             | acellular                                         | [6]          |
| Scombridae, Scombrini               | <i>Scomber scombrus</i>               | acellular                                         | [6]          |
| Scombridae, Scomberomorini          | <i>Scomberomorus cavalla</i>          | acellular                                         | [4]          |
|                                     | <i>Scomberomorus maculatus</i>        | acellular                                         | [4,9]        |
| Scombridae, Thunnini                | <i>Auxis rochei</i>                   | cellular                                          | [6]          |
|                                     | <i>Euthynnus affinis</i>              | cellular                                          | [10]         |
|                                     | <i>Euthynnus alletteratus</i>         | cellular                                          | [11]         |
|                                     | <i>Euthynnus lineatus</i>             | cellular                                          | [12]         |
|                                     | <i>Katsuwonus pelamis</i>             | cellular                                          | [4,5,10,13]  |
|                                     | <i>Thunnus alalunga</i>               | cellular                                          | [6,10,13–15] |
|                                     | <i>Thunnus albacares</i>              | cellular                                          | [10]         |
|                                     | <i>Thunnus obesus</i>                 | cellular (scales)                                 | [16]         |
| <i>Thunnus thynnus</i>              | cellular                              | [6,11,17]                                         |              |

## References

1. Wegner, N. C., Snodgrass, O. E., Dewar, H. & Hyde, J. R. 2015 Whole-body endothermy in a mesopelagic fish, the opah, *Lampris guttatus*. *Science*. **348**, 786–790. (doi:10.1126/science.aaa8902)
2. Runcie, R. M., Dewar, H., Hawn, D. R., Frank, L. R. & Dickson, K. A. 2009 Evidence for cranial endothermy in the opah (*Lampris guttatus*). *J. Exp. Biol.* **212**, 461–70. (doi:10.1242/jeb.022814)
3. Underkoffler, K. E., Luers, M. A., Hyde, J. R. & Craig, M. T. 2018 A taxonomic review of *Lampris guttatus* (Brünnich 1788) (Lampridiformes; Lampridae) with descriptions of three new species. *Zootaxa* **4413**, 551–565.
4. Moss, M. L. 1961 Studies of the acellular bone of teleost fish. I. Morphological and systematic variations. *Acta Anat.* **46**, 343–462.
5. Meunier, F. J. & Huysseune, A. 1992 The concept of bone tissue in osteichthyes. *Netherlands J. Zool.* **42**, 445–458. (doi:10.1163/156854291X00441)
6. Kölliker, A. 1859 On the different types in the microscopic structure of the skeleton of osseous fishes. *Proc. R. Soc. London* **9**, 656–668.
7. Paig-Tran, E. W. M., Barrios, A. S. & Ferry, L. A. 2016 Presence of repeating hyperostotic bones in dorsal pterygiophores of the oarfish, *Regalecus russellii*. *J. Anat.* **229**, 560–567. (doi:10.1111/joa.12503)
8. Atkins, A. et al. 2014 Remodeling in bone without osteocytes: billfish challenge bone structure–function paradigms. *Proc. Natl. Acad. Sci.* **111**, 16047–16052. (doi:10.1073/pnas.1412372111)
9. Moss, M. L. & Posner, A. S. 1960 X-ray diffraction study of acellular teleost bone. *Nature* **188**, 1037–1038. (doi:10.1038/1881037a0)
10. Meunier, F. J., Deschamps, M.-H., Lecomte, F. & Kacem, A. 2008 Le squelette des poissons téléostéens : structure, développement, physiologie, pathologie. *Bull. Soc.*

*Zool. Fr.* **133**, 9–32.

11. Amprino, R. & Godina, G. 1956 Osservazioni sul rinnovamento strutturale dell'osso in Pesci Teleostei. *Pubbl. Stn. Zool. Napoli* **28**, 62–71.
12. Béarez, P., Meunier, F. J. & Kacem, A. 2005 Description morphologique et histologique de l'hyperostose vertébrale chez la thonine noire, *Euthynnus lineatus* (Teleostei: Perciformes: Scombridae). *Cah. Biol. Mar.* **46**, 21–28.
13. Meunier, F. J. 1984 Etude de la minéralisation de l'os chez les téléostéens à l'aide de la microradiographie quantitative: résultats préliminaires. *Cybium* **8**, 43–49.
14. Meunier, F. J. 1987 Os cellulaire, os acellulaire et tissus dérivés chez les Ostéichthyens: les phénomènes de l'acellularisation et de la perte de minéralisation. *Ann. Biol.* **26**, 201–233.
15. Meunier, F. J. & Sire, J. 1981 Sur la structure et la minéralisation des écailles de germon, *Thunnus alalunga* (Téléostéen, Perciforme, Thunnidae). *Bull. Soc. Zool. Fr.* **106**, 327–336.
16. Wainwright, D. K., Ingersoll, S. & Lauder, G. V. 2018 Scale diversity in bigeye tuna (*Thunnus obesus*): Fat-filled trabecular scales made of cellular bone. *J. Morphol.* (doi:10.1002/jmor.20814)
17. Santamaria, N. et al. 2018 Micro-anatomical structure of the first spine of the dorsal fin of Atlantic bluefin tuna, *Thunnus thynnus* (Osteichthyes: Scombridae). *Ann. Anat.* **219**, 1–7. (doi:10.1016/j.aanat.2018.03.009)
